# Supplementary material
Source: ML conference proceedings conference paper supplement (https://openreview.net/forum?id=Kn-HA8DFik)
Supplement: supplementary_material [file attachment]

## A APPENDIX

### A.1 RESULTS OF THE DIFFERENT BATCH SIZES

We present the results of the SimCLR+CLD+FD trained with different batch sizes on the EuroSAT dataset (5-way 1-shot) in Figure 10. We can see that the optimal batch size is 32, so we utilize this value in all the experiments of our method.

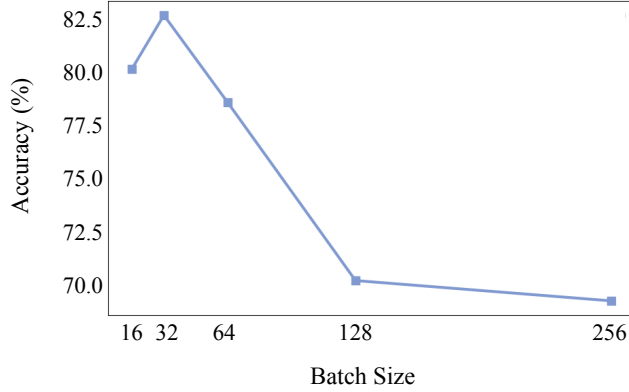

Figure 10: Results of the SimCLR+CLD+FD with the different batch sizes on the EuroSAT dataset (5-way 1-shot).

### A.2 RESULTS OF THE DIFFERENT PERCENTAGES OF UNLABELED IMAGES

Figure 11 shows that as more unlabeled target images become available, the accuracy of the model will gradually converge to a plateau.

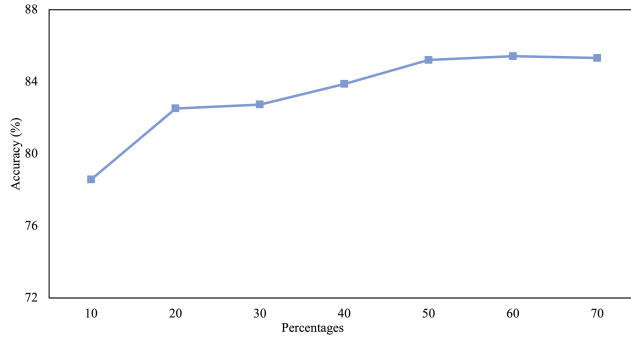

Figure 11: Results of the SimCLR+CLD+FD with the different percentages on the EuroSAT dataset (5-way 1-shot).

### A.3 RESULTS WITH SELF-SUPERVISED PRE-TRAINED TEACHER

Table 6: Results with self-supervised & supervised pre-trained teacher.

|                                 | EuroSAT    |            | CropDisease |            | ISIC       |            | ChestX     |            |
|---------------------------------|------------|------------|-------------|------------|------------|------------|------------|------------|
|                                 | 1-shot     | 5-shot     | 1-shot      | 5-shot     | 1-shot     | 5-shot     | 1-shot     | 5-shot     |
| SimCLR+CLR+FD (self-supervised) | 80.30±0.72 | 91.63±0.36 | 89.94±0.72  | 96.50±0.35 | 37.42±0.46 | 49.36±0.64 | 22.58±0.43 | 25.96±0.43 |
| SimCLR+CLR+FD (supervised)      | 82.52±0.76 | 92.89±0.34 | 90.48±0.72  | 96.58±0.39 | 39.70±0.69 | 52.29±0.62 | 22.39±0.44 | 25.98±0.43 |

On the EuroSAT dataset (5-way 1-shot), we give the results of the SimCLR+FD+CLD where the teacher is pre-trained in a self-supervised scheme. The performances of the SimCLR+CLD+FD are shown in Table 6.
